# Supplementary material for: A novel method of forming micro- and macroporous monetite cements
Source: Royal Society of Chemistry journal article supplement (doi:10.1039/c2tb00153e), 2012-11-15
Supplement: c2tb00153e.pdf [file c2tb00153e.pdf]

## Appendix

Function  $f\left(\frac{a}{W}\right)$ :

$$f\left(\frac{a}{W}\right) = \frac{3\left(\frac{a}{W}\right)^{1/2} \left[ 1.99 - \frac{a}{W} \left(1 - \frac{a}{W}\right) \left\{ 2.15 - 3.93\left(\frac{a}{W}\right) + 2.7\left(\frac{a}{W}\right)^2 \right\} \right]}{2\left(1 + 2\frac{a}{W}\right) \left(1 - \frac{a}{W}\right)^{3/2}}$$

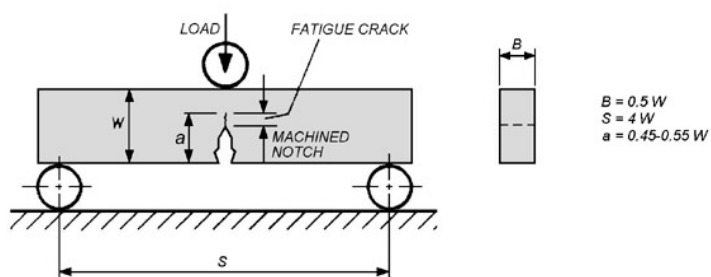

Drawing of the recommended single edge notch bend (SENB) specimen.
